# Supplementary material for: Skeletal Muscle Mitochondrial Respiration and Exercise Intolerance in Patients With Heart Failure With Preserved Ejection Fraction
Source: PubMed Central journal article supplement (PMC10173105; doi:10.1001/jamacardio.2023.0957), 2023-05-10

## Supplemental Online Content

Scandalis L, Kitzman DW, Nicklas BJ, et al. Skeletal muscle mitochondrial respiration and exercise intolerance in patients with heart failure with preserved ejection fraction. *JAMA Cardiol.* Published online May 10, 2023. doi:10.1001/jamacardio.2023.0957

**eTable 1.** Correlation Between Skeletal Muscle Respiration and Physical Function

**eTable 2.** Correlation Between Skeletal Muscle Respiration and Peak VO<sub>2</sub> by HFpEF Status

**eFigure 1.** Representative High-Resolution Respirometry Trace

**eFigure 2.** Association Between Skeletal Muscle Respiration and Peak VO<sub>2</sub> in HFpEF and Healthy Controls

This supplementary material has been provided by the authors to give readers additional information about their work.

**eTable 1.** Correlation Between Skeletal Muscle Respiration and Physical Function

| Physical Function Measurements   | CXI, N <sub>P</sub> |                 | CXI+CXII, NS <sub>P</sub> |                 | MAX ETS, NS <sub>E</sub> |                 |
|----------------------------------|---------------------|-----------------|---------------------------|-----------------|--------------------------|-----------------|
|                                  | <i>r</i>            | <i>p</i> -value | <i>r</i>                  | <i>p</i> -value | <i>r</i>                 | <i>p</i> -value |
| Peak VO <sub>2</sub> , mL/kg/min | 0.70                | <.001           | 0.69                      | <.001           | 0.69                     | <.001           |
| Peak VO <sub>2</sub> , mL/min    | 0.43                | <.001           | 0.47                      | <.001           | 0.41                     | <.001           |
| 6-minute walk distance           | 0.69                | <.001           | 0.69                      | <.001           | 0.69                     | <.001           |
| SPPB total                       | 0.44                | <.001           | 0.44                      | <.001           | 0.46                     | <.001           |
| SPPB gait speed                  | -0.51               | <.001           | -0.52                     | <.001           | -0.53                    | <.001           |
| SPPB chair time                  | -0.53               | <.001           | -0.52                     | <.001           | -0.55                    | <.001           |
| Leg Strength – right             | 0.24                | .07             | 0.26                      | .05             | 0.21                     | .11             |
| Leg Strength - left              | 0.42                | .002            | 0.44                      | <.001           | 0.41                     | .002            |

Pearson correlation coefficients and p-values for each association are shown.

CXI, N<sub>P</sub>, NADH-linked pathway through mitochondrial Complex I; CXI+CXII, NS<sub>P</sub>, NADH/Succinate combined pathway through Complexes I and II; MAX ETS, NS<sub>E</sub>, maximum electron transport in the NADH/Succinate ET state; *r*, Pearson correlation coefficient; Peak VO<sub>2</sub>, peak exercise oxygen consumption; SPPB, Short physical performance battery.

**eTable 2.** Correlation Between Skeletal Muscle Respiration and Peak VO<sub>2</sub> by HFpEF Status

|                                 | Peak VO <sub>2</sub> , mL/kg/min |         |           |         |
|---------------------------------|----------------------------------|---------|-----------|---------|
|                                 | HFpEF (N=27)                     |         | HC (N=45) |         |
|                                 | R                                | p-value | r         | p-value |
| <b>CXI, N<sub>P</sub></b>       | 0.45                             | .0194   | 0.26      | .0787   |
| <b>CXI+CXII, NS<sub>P</sub></b> | 0.47                             | .0145   | 0.31      | .0393   |
| <b>MAX ETS, NS<sub>E</sub></b>  | 0.28                             | .1508   | 0.28      | .0642   |

**eFigure 1.** Representative High-Resolution Respirometry Trace

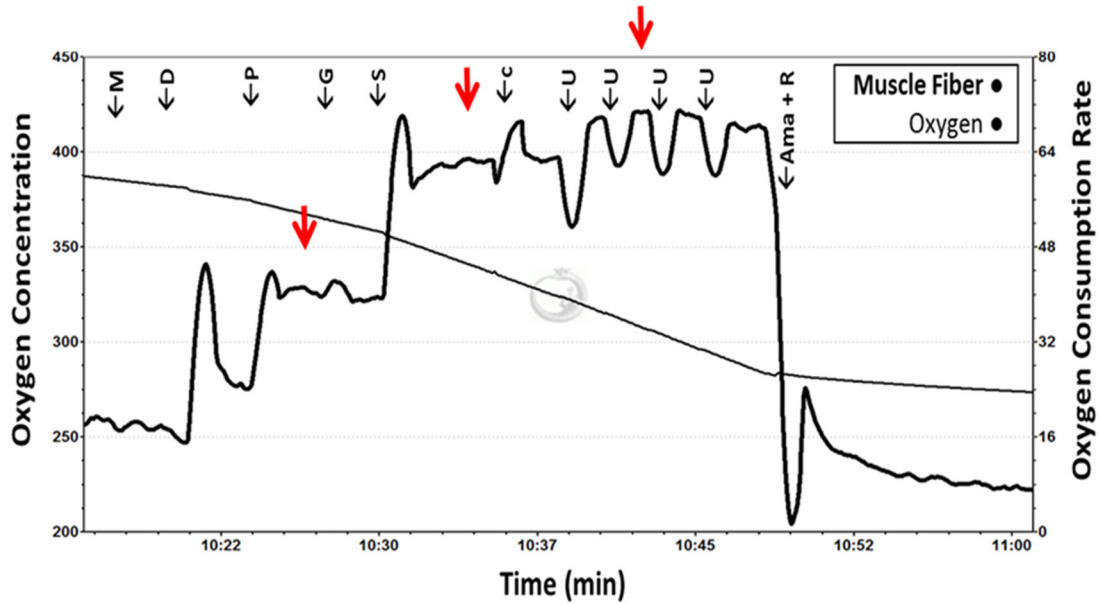

Red arrows (from left to right) depict respiratory control states for OXPHOS capacity of the NADH pathway through Complex I (complex I, NP), the convergent NADH- and succinate pathway through Complex I and Complex II (complex I+complex II, NS<sub>P</sub>), and the maximal electron transfer capacity of the systems-pathway (maximal capacity, NS<sub>E</sub>).

**eFigure 2.** Association Between Skeletal Muscle Respiration and Peak VO<sub>2</sub> in HFpEF and Healthy Controls

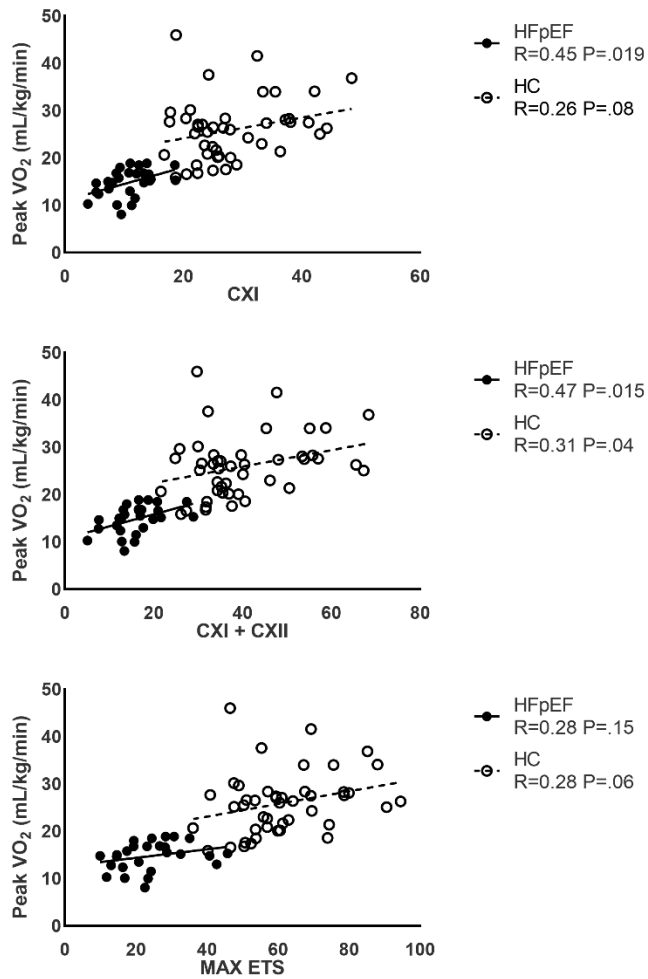

Supplement: jamacardiol-e230957-s001.pdf [file jamacardiol-e230957-s001.pdf]
