# Supplementary material for: Skeletal Muscle Mitochondrial Respiration and Exercise Intolerance in Patients With Heart Failure With Preserved Ejection Fraction
Source: PubMed Central journal article supplement (PMC10173105; doi:10.1001/jamacardio.2023.0957), 2023-05-10
Supplement: jamacardiol-e230957-s002.pdf [file jamacardiol-e230957-s002.pdf]

## Data Sharing Statement

Scandalis. Skeletal Muscle Mitochondrial Respiration and Exercise Intolerance in Patients With Heart Failure With Preserved Ejection Fraction. *JAMA Cardiol.* Published May 10, 2023.

doi:10.1001/jamacardio.2023.0957

### Data

**Data available:** Yes

**Data types:** Deidentified participant data

**How to access data:** [ajmolina@health.ucsd.edu](mailto:ajmolina@health.ucsd.edu)

**When available:** With publication

### Supporting Documents

**Document types:** None

### Additional Information

**Who can access the data:** Researchers whose proposed use of the data has been approved

**Types of analyses:** Any purpose

**Mechanisms of data availability:** With investigator support

**Any additional restrictions:** none
